# Supplementary material for: In Silico Systems Biology Analysis of Variants of Uncertain Significance in Lynch Syndrome Supports the Prioritization of Functional Molecular Validation
Source: Oxford University Press journal article supplement (doi:10.1158/1940-6207.capr-17-0058), 2017-08-01
Supplement: 19406207capr170058-sup-179737_2_supp_4167785_4t4r6j.xlsx [file 19406207capr170058-sup-179737_2_supp_4167785_4t4r6j.xlsx]

## Sheet: S1
Supplementary Table 1. Variants of unknown significance detected in the MD Anderson cohort. Abbreviations: M, missense; S, splicing; I, indel; NR, not reported; NA, not available
Gene	DNA change	Protein change	Mutation Type	Reported in Insight or Clinic Variation	Times reported in Insight	Insight Class	Clinic Variation Class	rs number	Freq dbSNP	patient ID
MLH1	c.143A>C	p.Q48P	M	Yes	1	4	Likely pathogenic	rs587778914		MDACC38
MLH1	c.208-3C>G	p.?	S	Yes	3	4	Likely pathogenic	rs267607720		MDACC68
MLH1	c.290A>G	p.Y97C	M	NR	NA	NA	VUS	rs773647920	0.000189	MDACC58
MLH1	c.292G>A	p.G98S	M	Yes	8	3	VUS	rs267607725		MDACC04
MLH1	c.299G>A	p.R100Q	M	Yes	2	3	VUS	rs63750266	0.0002	MDACC58
MLH1	c.306G>T	p.E102D	M	Yes	13	4	Likely pathogenic	rs63751665	8e-06	MDACC32; MDACC45; MDACC48; MDACC76; MDACC80
MLH1	c.326A>C	p.H109P	M	Yes	3	3	VUS	rs587779004		MDACC30
MLH1	c.539T>G	p.V180G	M	Yes	6	3	VUS	rs63750102	3.3e-05	MDACC74
MLH1	c.601G>C	p.V201L	M	NR	NA	NA	VUS	rs534184145	0.0002	MDACC77
MLH1	c.617C>T	p.T206I	M	NR	NA	NA	NA	NA		MDACC62
MLH1	c.647T>A	p.I216N	M	NR	NA	NA	NA	NA		MDACC73
MLH1	c.830A>G	p.E277G	M	NR	NA	NA	NA	NA		MDACC88
MLH1	c.935A>C	p.H312P	M	Yes	1	NA	NA	NA		MDACC72
MLH1	c.1410-10T>G	p.?	S	NR	NA	NA	NA	NA		MDACC18
MLH1	c.1517T>C	p.V506A	M	Yes	22	3	VUS	rs63749909		MDACC08
MLH1	c.1595G>A	p.G532D	M	NR	NA	NA	NA	NA		MDACC55
MLH1	c.1850A>C	p.K617T	M	NR	NA	NA	NA	NA		MDACC35
MLH1	c.1889 T>A	p.I630N	M	NR	NA	NA	NA	NA		MDACC20
MLH1	c.1958T>G	p.L653R	M	Yes	17	3	VUS	rs63751202		MDACC28
MSH2	c.147C>G	p.D49E	M	NR	NA	NA	VUS	rs730881771	8e-06	MDACC21
MSH2	c.328A>C	p.K110Q	M	NR	NA	NA	VUS	rs587779970		MDACC64
MSH2	c.806C>T	p.S269L	M	Yes	12	3	VUS	rs63750058		MDACC31
MSH2	c.1121A>G	p.Q374R	M	NR	NA	NA	NA	NA		MDACC25
MSH2	c.1361T>G	p.I454R	M	NR	NA	NA	NA	NA		MDACC41; MDACC53
MSH2	c.1387-59del231	p.?	I	NR	NA	NA	NA	NA		MDACC02
MSH2	c.1387-8G>T	p.?	S	Yes	10	2	Likely benign	rs187525243	0.000998	MDACC09
MSH2	c.1804C>G	p.L602V	M	NR	NA	NA	NA	NA		MDACC70
MSH2	c.1815_1817del	p.V606del	I	Yes	2	3	VUS	rs267607978		MDACC59
MSH2	c.2030C>G	p.T677R	M	NR	NA	NA	NA	NA		MDACC42
MSH2	c.2210+7G>T	p.?	S	NR	NA	NA	NA	NA		MDACC27
MSH2	c.2234T>G	p.I745R	M	NR	NA	NA	NA	NA		MDACC67
MSH2	c.2320A>G	p.I774V	M	NR	NA	NA	NA	NA		MDACC40
MSH2	c.2510C>T	p.P837L	M	NR	NA	NA	NA	rs267599938		MDACC89
MSH2	c.2635-3C>G	p.?	S	Yes	2	3	VUS	rs587779153		MDACC15
MSH6	c.59C>T	p.A20V	M	Yes	1	3	VUS	rs63750664	0.0002	MDACC02
MSH6	c.866_867delinsAA	p.G289E	M	NR	NA	NA	VUS	rs267608079		MDACC53
MSH6	c.1109T>C	p.L370S	M	Yes	2	3	VUS	rs587779204		MDACC85
MSH6	c.1295T>C	p.F432S	M	NR	NA	NA	Likely pathogenic	rs750528093	8e-06	MDACC08; MDACC82
MSH6	c.1508C>G	p.S503C	M	Yes	18	2	Likely benign	rs63750897	0.000736	MDACC22
MSH6	c.1857A>C	p.E619D	M	Yes	2	3	VUS	rs63751121	3.3e-05	MDACC71
MSH6	c.2403_2426del	p.P802_V809del	I	NR	NA	NA	NA	NA		MDACC47
MSH6	c.3303G>T	p.K1101N	M	NR	NA	NA	NA	NA		MDACC43
MSH6	c.3724_3726del	p.R1242del	I	Yes	1	4	Likely pathogenic	rs63749942		MDACC66
MSH6	c.3744_3773del	p.H1248_S1257del	I	NR	NA	NA	NA	NA		MDACC78
MSH6	c.4062_4065dup	p.L1356Dfs*4	I	NR	NA	NA	VUS	rs55740729	0.007987	MDACC80
PMS2	c.52A>G	p.I18V	M	Yes	11	2	VUS	rs63750123	0.003195	MDACC81
PMS2	c.137G>T	p.S46I	M	Yes	20	4	VUS	rs1805321	0.358227	MDACC69
PMS2	c.251-18C>G	p.?	S	NR	NA	NA	NA	NA		MDACC91
PMS2	c.383C>T	p.S128L	M	NR	NA	NA	likely benign	rs116373169	0.000998	MDACC49
PMS2	c.1437C>G	p.H479Q	M	Yes	5	3	VUS	rs63750685	0.002796	MDACC34; MDACC58
PMS2	c.2276-17A>G	p.?	S	NR	NA	NA	NA	NA		MDACC90
PMS2	c.2356C>A	p.L786M	M	NR	NA	NA	VUS	rs576055272	0.001797	MDACC80
PMS2	c.2527T>C	p.C843R	M	NR	NA	NA	NA	NA		MDACC75
PMS2	c.2531C>A	p.P844H	M	NR	NA	NA	VUS	rs587782787		MDACC86

## Sheet: S2
Supplementary Table 2. Clinical characteristics of the VUS carriers reported in Supplementary Table 1. Pathogenic mutations detected in the same patient carrying a VUS are presented in bold. Abbreviations: Ams, Amsterdam criteria; Bet, Bethesda criteria; P/FH, parent or family with tumor history; UT, universal testing; F, female; M, male; W, white; B, black; H, hispanic; A, asian; ND, not determi…
Patient ID	Criteria	Gender	Race	MLH1	MSH2	MSH6	PMS2	MSI	Cancer Dx	Age Dx	Cancer Dx	Age Dx	Cancer Dx	Age Dx	Cancer Dx	Age Dx	Gene	DNA mut	Prot mut	Gene	DNA mut	Prot mut	Gene	DNA mut	Prot mut
MDACC02	Ams	F	W	+	-	-	+	MSI-H	CRC	49							MSH2	c.1387-59del231	p.?	MSH6	c.1295T>C	p.F432S	MSH6	c.59C>T	p.A20V
MDACC04	Ams	M	W	ND	ND	ND	ND	ND	CRC	51	Oth	63					MLH1	c.292G>A	p.G98S
MDACC08	Bet	M	W	ND	ND	ND	ND	ND	CRC	42	Oth						MLH1	c.1517T>C	p.V506A	MLH1	c.1852_1853delinsGC	p.K618A
MDACC09	Ams	M	W	+	-	-	ND	MSI-H	UrT	51	UrT	52	UrT	57	CRC	60	MSH2	c.1387-8G>T	p.?
MDACC15	Ams	M	W	+	-	-	ND	MSI-H	CRC	38	CRC	53	CRC	67	CRC	68	MSH2	c.2635-3C>G	p.?
MDACC18	Bet	F	B	-	+	+	ND	MSI-H	CRC	56	BC	68	Skin	73			MLH1	c.1410-10T>G	p.?
MDACC20	Ams	F	W	-	+	ND	ND	ND	CRC	32							MLH1	c.1889 T>A	p.I630N
MDACC21	P/FH	M	W	+	+	+	+	ND	Oth	34							MSH2	c.147C>G	p.D49E
MDACC22	Bet	F	W	+	+	-	ND	MSI-H	CRC	46							MSH6	c.1508C>G	p.S503C
MDACC25	P/FH	F	A	-	+	+	-	MSI-H	EC	39							MSH2	c.1121A>G	p.Q374R
MDACC27	Bet	F	W	+	-	-	ND	MSI-H	Oth	38	CRC	38	CRC	41			MSH2	c.2210+7G>T	p.?	MSH2	c.181C>T	p.Q16*
MDACC28	Bet	M	W	+	+	+	ND	MSI-H	CRC	21	CRC	41					MLH1	c.1958T>G	p.L653R
MDACC30	Bet	M	W	-	+	+	-	MSI-H	CRC	42							MLH1	c.326A>C	p.H109P
MDACC31	Ams	M	W	+	-	-	+	MSI-H	CRC	33							MSH2	c.806C>T	p.S269L
MDACC32	Bet	M	A	-	+	+	-	MSI-H	CRC	45	CRC	46					MLH1	c.306G>T	p.E102D
MDACC34	Bet	F	B	-	+	+	+	MSI-H	CRC	37							PMS2	c.1437C>G	p.H479Q	MLH1	c.793C>T	p.H264Lfs*2
MDACC35	Bet	M	W	+	-	-	+	ND	CRC	47							MLH1	c.1850A>C	p.(K617T)
MDACC38	UT	M	W	-	+	+	-	MSI-H	CRC	50							MLH1	c.143A>C	p.Q48P
MDACC40	Bet	M	H	+	-	-	+	ND	Oth	26	CRC	30					MSH2	c.2320A>G	p.I774V
MDACC41	Ams	F	W	+	-	-	+	MSI-H	EC	42	OC	42					MSH2	c.1361T>G	p.I454R
MDACC42	Bet	F	W	+	+	+	+	MSI-H	CRC	44							MSH2	c.2030C>G	p.T677R
MDACC43	Ams	F	B	+	+	+	+	MSS	CRC	38							MSH6	c.3303G>T	p.K1101N
MDACC45	Bet	M	A	-	+	+	-	MSI-H	CRC	37							MLH1	c.306G>T	p.E102D
MDACC47	Bet	M	W	+	+	+	+	ND	CRC	42	CRC	42	Oth	73			MSH6	c.2403_2426del	p.P802_V809del
MDACC48	Bet	M	A	-	+	-	-	MSI-H	CRC	55	CRC	56					MLH1	c.306G>T	p.E102D
MDACC49	Bet	M	W	+	+	+	-	ND	CRC	50							PMS2	c.383C>T	p.S128L
MDACC53	Bet	M	W	+	-	-	+	MSI-H	CRC	39							MSH2	c.1361T>G	p.I454R	MSH6	c.866_867delinsAA	p.G289G
MDACC55	P/FH	F	W	+	+	+	+	MSS	EC	63							MLH1	c.1595G>A	p.G532D	MLH1	c.977T>C	p.V326A
MDACC58	Bet	M	A	+	+	+	+	MSI-H	Oth	55	CRC	57					MLH1	c.290A>G	p.Y97C	MLH1	c.299G>A	p.R100Q	PMS2	c.1437C>G	p.H479Q
MDACC59	Bet	F	W	+	-	-	+	ND	CRC	50							MSH2	c.1815_1817del	p.V606del
MDACC62	Bet	F	A	-	+	+	-	MSI-H	CRC	35							MLH1	c.617C>T	p.T206I
MDACC64	Bet	M	W	+	ND	ND	+	MSI-H	CRC	35							MSH2	c.328A>C	p.K110Q
MDACC66	P/FH	F	A	+	+	-	+	MSI-H	EC	52							MSH6	c.3724_3726del	p.R1242del
MDACC67	Bet	F	W	+	-	-	+	MSI-H	CRC	46	Oth	50					MSH2	c.2234T>G	p.I745R
MDACC68	Bet	M	A	-	+	+	-	MSI-H	CRC	36							MLH1	c.208-3C>G	p.?
MDACC69	Bet	M	W	+	+	+	-	ND	CRC	22							PMS2	c.137G>T	p.S46I
MDACC70	Bet	M	W	-	+	-	-	MSI-H	CRC	67	CRC	69					MSH2	c.1804C>G	p.L602V
MDACC71	Ams	F	W	ND	ND	ND	ND	ND	Oth	39	Oth						MSH6	c.1857A>C	p.E619D
MDACC72	Ams	M	W	+	+	+	+	MSI-H	CRC	41							MLH1	c.935A>C	p.H312P
MDACC73	Bet	M	W	-	+	+	-	MSI-H	CRC	38							MLH1	c.647T>A	p.I216N
MDACC74	Bet	M	W	+	+	+	+	MSS	CRC	46							MLH1	c.539T>G	p.V180G
MDACC75	P/FH	F	W	FE	+	-	FE	MSI-H	Skin	52	EC	52					PMS2	c.2527T>C	p.C843R
MDACC76	Bet	M	A	-	+	+	-	MSI-H	CRC	34							MLH1	c.306G>T	p.E102D
MDACC77	Bet	M	W	-	+	+	-	MSS	CRC	59	CRC	59					MLH1	c.601G>C	p.V201L
MDACC78	UT	M	W	+	+	-	+	MSI-H	CRC	50							MSH6	c.3744_3773del	p.H1248_S1257del
MDACC80	Bet	F	A	ND	ND	ND	ND	ND	CRC	39	EC	57	CRC	61			MLH1	c.306G>T	p.E102D	MSH6	c.4062_4065dup	p.L1356Dfs*4	PMS2	c.2356C>A	p.L786M
MDACC81	Ams	M	W	ND	ND	ND	ND	ND									PMS2	c.52A>G	p.I18V	MSH2	c.647dup	p.I216Ifs*19
MDACC82	Bet	F	W	+	+	+	+	MSI-L	EC	51	CRC	53					MSH6	c.1295T>C	p.F432S
MDACC85	UT	F	W	+	+	+	+	MSI-L	EC	53							MSH6	c.1109T>C	p.L370S
MDACC86	Bet	F	W	+	+	+	+	MSS	CRC	50							PMS2	c.2531C>A	p.P844H
MDACC88	Ams	M	W	+	+	+	+	MSS	CRC	44							MLH1	c.830A>G	p.E277G
MDACC89	Bet	M	W	+	+	+	+	MSI-L	CRC	51	CRC	77					MSH2	c.2510C>T	p.P837L
MDACC90	Ams	F	W	ND	ND	ND	ND	ND	OC	17							PMS2	c.2276-17A>G	p.?
MDACC91	Ams	F	W	+	-	-	+	ND	EC	52							PMS2	c.251-18C>G	p.?

## Sheet: S3 
Supplementary Table 3. Clinical characteristics of carriers of variants reclassified as InSIGHT Class 1 and 5. These variants have been used for validation purposes. Abbreviations: Ams, Amsterdam criteria; Bet, Bethesda criteria; P/FH, parent or family with tumor history; UT, universal testing; F, female; M, male; W, white; B, black; H, hispanic; A, asian; ND, not determined; CRC, colorectal canc…
Patient ID	Criteria	Gender	Race	MLH1	MSH2	MSH6	PMS2	MSI	Cancer Dx	Age Dx	Cancer Dx	Age Dx	Cancer Dx	Age Dx	Gene	DNA mut	Prot mut	Reported in LOVD	Classification reported	Gene	DNA mut	Prot mut	Reported in LOVD	Classification reported
MDACC100	Ams	M	W	ND	ND	ND	ND	ND	CRC	36	CRC	56			MLH1	c.199G>A	p.Gly67Arg	Yes (85)	Damaging (class 5)
MDACC101	Ams	M	H	-	+	+	ND	MSI-H	CRC	20	CRC	46			MLH1	c.1731G>A	p.Ser556Argfs*14	Yes (55)	Damaging (class 5)
MDACC102	Beth	F	A	-	+	+	-	MSI-H	BC	36	EC	45	CRC	56	MLH1	c.1151T>A	p.Val384Asp	Yes (45)	Neutral (class 1)
MDACC103	Ams	F	B	+	+	+	+	ND	CRC	33					MSH2	c.380A>G	p.Asn127Ser	Yes (30)	Neutral (class 1)	PMS2	c.1532C>T	p.Thr511Met	Yes (2)	Neutral (class 1)
MDACC104	Ams	F	B	+	-	-	+	MSI-H	Oth	26	CRC	40	CRC	40	MSH2	c.2047G>A	p.Gly683Arg	Yes (1)	Damaging (class 5)
MDACC105	Ams	F	W	ND	ND	ND	ND	ND	EC	46					MLH1	c.199G>A	p.Gly67Arg	Yes (85)	Damaging (class 5)
MDACC106	Ams	M	W	ND	ND	ND	ND	MSI-H	CRC	20					MLH1	c.655A>G	p.Ile219Val	Yes (300)	Neutral (class 1)
MDACC107	Beth	M	B	+	-	-	ND	MSI-H	CRC	52	Oth	59			MSH2	c.2047G>A	p.Gly683Arg	Yes (1)	Damaging (class 5)
MDACC108	Beth	M	W	+	-	-	+	MSI-H	CRC	38	CRC	50	CRC	53	MSH2	c.942+3 A>T	p.?	Yes (168)	Damaging (class 5)
MDACC109	Beth	F	W	ND	ND	ND	ND	MSI-H	CRC	25					MSH2	c.942+3 A>T	p.?	Yes (168)	Damaging (class 5)
MDACC110	Ams	M	W	ND	ND	ND	ND	ND	Oth	64	Oth	68	Oth	70	MSH2	c.942+3 A>T	p.?	Yes (168)	Damaging (class 5)
MDACC111	Beth	M	W	ND	ND	ND	ND	ND	CRC	48					MLH1	c.1852_1853delinsGC	p.Lys618Ala	Yes (273)	Neutral (class 1)
MDACC112	Ams	F	W	ND	ND	ND	ND	ND							MSH2	c.942+3 A>T	p.?	Yes (168)	Damaging (class 5)
MDACC113	Beth	M	W	ND	ND	ND	ND	ND	CRC	42					MLH1	c.1852_1853delinsGC	p.Lys618Ala	Yes (273)	Neutral (class 1)
MDACC114	Ams	F	W	ND	ND	ND	ND	ND	CRC	46					MSH2	c.1786_1788del	p.Asn596del	Yes (49)	Damaging (class 5)
MDACC115	Beth	F	W	ND	ND	ND	ND	ND	CRC	30					MLH1	c.1038G>A	p.Thr347Valfs*14	Yes (3)	Damaging (class 5)
MDACC116	Beth	M	W	+	-	-	+	ND	CRC	35	CRC	53	UrT	58	MSH2	c.2634G>A	p.Gly820Alafs*3	Yes (1)	Damaging (class 5)
MDACC117	Ams	M	W	-	+	+	ND	MSI-H	CRC	33					MLH1	c.199G>A	p.Gly67Arg	Yes (85)	Damaging (class 5)
MDACC118	Ams	F	W	ND	ND	ND	ND	ND	EC	54					MSH2	c.1906G>C	p.Ala636Pro	Yes (53)	Damaging (class 5)
MDACC119	Ams	M	W	ND	ND	ND	ND	ND	CRC	34	Oth	34	Oth	36	MSH2	c.942+3 A>T	p.?	Yes (168)	Damaging (class 5)
MDACC120	P/FH	F	B	+	-	-	+	MSI-H	EC	45					MSH2	c.2047G>A	p.Gly683Arg	Yes (1)	Damaging (class 5)
MDACC121	Beth	F	B	+	-	-	+	MSI-H	CRC	33					MSH2	c.2047G>A	p.Gly683Arg	Yes (1)	Damaging (class 5)
MDACC122	P/FH	F	W	-	+	+	-	MSS	CRC	51					MLH1	c.739T>C	p.Ser247Pro	Yes (21)	Damaging (class 5)
MDACC123	P/FH	M	W	-	+	+	-	MSI-H	Oth	39					MLH1	c.1852_1853delinsGC	p.Lys618Ala	Yes (273)	Neutral (class 1)
MDACC124	Ams	F	W	-	+	+	-	MSI-H	CRC	46	EC	46			MLH1	c.199G>A	p.Gly67Arg	Yes (85)	Damaging (class 5)
MDACC125	Beth	F	B	-	+	+	+	MSI-H	CRC	37					MLH1	c.793C>T	p.Arg265Cys	Yes (63)	Damaging (class 5)
MDACC126	Ams	M	W	+	-	-	+	ND	Oth	75					MSH2	c.1906G>C	p.Ala636Pro	Yes (53)	Damaging (class 5)
MDACC127	Beth	F	H	-	+	+	-	MSI-H	CRC	36	CRC	61	CRC	61	MLH1	c.1852_1854del	p.Lys618del	Yes (133)	Neutral (class 1)
MDACC128	Beth	F	H	-	+	+	-	MSI-H	CRC	27					MLH1	c.588+5G>A	p.?	Yes (4)	Damaging (class 5)
MDACC129	Beth	M	W	-	+	+	-	MSI-H	CRC	50					MLH1	c.1038G>A	p.Thr347Valfs*14	Yes (3)	Damaging (class 5)
MDACC130	Beth	M	A	ND	ND	ND	ND	ND	CRC	40	CRC	40			MLH1	c.677G>A	p.Arg226Gln	Yes (60)	Damaging (class 5)
MDACC131	Beth	F	W	+	-	-	+	MSI-H	CRC	20					MSH2	c.942+3 A>T	p.?	Yes (168)	Damaging (class 5)
MDACC132	UT	F	W	-	+	+	-	ND	CRC	70					MLH1	c.1852_1853delinsGC	p.Lys618Ala	Yes (273)	Neutral (class 1)
MDACC133	P/FH	F	W	+	+	+	+	MSS	EC	63					MLH1	c.977T>C	p.Val326Ala	Yes (49)	Neutral (class 1)
MDACC134	Beth	F	W	-	+	+	-	ND	CRC	49					MLH1	c.1038G>A	p.Thr347Valfs*14	Yes (3)	Damaging (class 5)
MDACC135	Beth	M	W	+	-	-	+	MSI-H	CRC	44	CRC	44			MSH2	c.942+3 A>T	p.?	Yes (168)	Damaging (class 5)
MDACC136	UT	M	H	+	+	+	-	MSS	CRC	51					PMS2	c.1789A>T	p.Thr597Ser	Yes (14)	Neutral (class 1)
MDACC137	Ams	F	W	-	+	+	-	MSI-H	CRC	38					MLH1	c.1852_1853delinsGC	p.Lys618Ala	Yes (273)	Neutral (class 1)
MDACC138	Beth	F	A	-	+	+	-	MSI-H	CRC	44					MLH1	c.2041G>A	p.Ala681Thr	Yes (77)	Damaging (class 5)

## Sheet: S4
Supplementary Table 4. Validation set of splicing variants obtained from the InSiGHT database that have been already re-classified as Class 1 and 5.
Gene	DNA change	Protein change	Classification reported
MLH1	c.1990-2A>G	p.?	Damaging (class 5)
MLH1	c.545+3A>G	p.?	Damaging (class 5)
MLH1	c.791-5T>G	p.?	Damaging (class 5)
MLH1	c.884+4A>G	p.?	Damaging (class 5)
MLH1	c.1039-8T>A	p.?	Neutral (class 1)
MLH1	c.453+79A>G	p.?	Neutral (class 1)
MLH1	c.655A>G	p.Ile219Leu	Neutral (class 1)
MLH1	c.678-1G>C	p.?	Neutral (class 1)
MSH2	c.2005+2T>C	p.?	Damaging (class 5)
MSH2	c.2634+5G>C	p.?	Damaging (class 5)
MSH2	c.645+1G>A	p.?	Damaging (class 5)
MSH2	c.646-3T>G	p.?	Damaging (class 5)
MSH2	c.1077-80G>A	p.?	Neutral (class 1)
MSH2	c.1662-9G>A	p.?	Neutral (class 1)
MSH2	c.2345C>T	p.Thr782Ile	Neutral (class 1)
MSH2	c.965G>A	p.Gly322Asp	Neutral (class 1)
MSH6	c.4001+2T>C	p.?	Damaging (class 5)
MSH6	c.457+2T>A	p.?	Damaging (class 5)
MSH6	c.116G>A	p.Gly39Glu	Neutral (class 1)
MSH6	c.3557-3A>T	p.?	Neutral (class 1)
PMS2	c.2174+1G>A	p.?	Damaging (class 5)
PMS2	c.989-1G>T	p.?	Damaging (class 5)
PMS2	c.1866G>A	p.Met622Ile	Neutral (class 1)
PMS2	c.251-72A>G	p.?	Neutral (class 1)

## Sheet: S5
Supplementary Table 5. Classification at the RNA level using three bioinformatic in silico programs of all reported VUS. Results in gray indicate major alterations which are those that are predicted to destroy or create splicing sites or produce a SS score modification ≥20%; Predictions are interpreted as inconclusive when the same results are not obtained by all the programs used. Abbreviations:…
Gene	DNA change	Protein change	Mutation Type	NNSplice	Softberry	Spliceport	Final classification at mRNA level
MLH1	c.143A>C	p.Q48P	M	NE	NE	NE	NE
MLH1	c.208-3C>G	p.?	S	A-SS	NE	A-SS	A-SS
MLH1	c.290A>G	p.Y97C	M	NE	NE	NE	NE
MLH1	c.292G>A	p.G98S	M	A-SS	NE	A-SS	A-SS
MLH1	c.299G>A	p.R100Q	M	A-SS	NE	NE	Inc
MLH1	c.306G>T	p.E102D	M	A-SS	A-SS	A-SS	A-SS
MLH1	c.326A>C	p.H109P	M	NE	NE	NE	NE
MLH1	c.539T>G	p.V180G	M	NE	NE	NE	NE
MLH1	c.601G>C	p.V201L	M	NE	NE	NE	NE
MLH1	c.617C>T	p.T206I	M	NE	NE	NE	NE
MLH1	c.647T>A	p.I216N	M	NE	NE	NE	NE
MLH1	c.830A>G	p.E277G	M	NE	NE	NE	NE
MLH1	c.935A>C	p.H312P	M	NE	NE	NE	NE
MLH1	c.1410-10T>G	p.?	S	NE	NE	A-SS	Inc
MLH1	c.1517T>C	p.V506A	M	NE	NE	NE	NE
MLH1	c.1595G>A	p.G532D	M	NE	NE	NE	NE
MLH1	c.1850A>C	p.K617T	M	NE	NE	A-SS	Inc
MLH1	c.1889T>A	p.I630N	M	NE	NE	NE	NE
MLH1	c.1958T>G	p.L653R	M	NE	A-SS	NE	Inc
MSH2	c.147C>G	p.D49E	M	NE	NE	NE	NE
MSH2	c.328A>C	p.K110Q	M	NE	NE	NE	NE
MSH2	c.806C>T	p.S269L	M	NE	NE	NE	NE
MSH2	c.1121A>G	p.Q374R	M	NE	NE	NE	NE
MSH2	c.1361T>G	p.I454R	M	NE	NE	NE	NE
MSH2	c.1387-59del231	p.?	I	NE	NE	NE	NE
MSH2	c.1387-8G>T	p.?	S	NE	NE	NE	NE
MSH2	c.1804C>G	p.L602V	M	NE	NE	NE	NE
MSH2	c.1815_1817del	p.V606del	I	NE	NE	NE	NE
MSH2	c.2030C>G	p.T677R	M	NE	NE	NE	NE
MSH2	c.2210+7G>T	p.?	S	NE	NE	NE	NE
MSH2	c.2234T>G	p.I745R	M	NE	NE	NE	NE
MSH2	c.2320A>G	p.I774V	M	A-SS	A-SS	A-SS	A-SS
MSH2	c.2510C>T	p.P837L	M	NE	NE	NE	NE
MSH2	c.2635-3C>G	p.?	S	A-SS	NE	A-SS	A-SS
MSH6	c.59C>T	p.A20V	M	NE	NE	NE	NE
MSH6	c.866_867delinsAA	p.G289E	M	NE	NE	NE	NE
MSH6	c.1109T>C	p.L370S	M	NE	NE	NE	NE
MSH6	c.1295T>C	p.F432S	M	NE	NE	NE	NE
MSH6	c.1508C>G	p.S503C	M	NE	NE	NE	NE
MSH6	c.1857A>C	p.E619D	M	NE	NE	NE	NE
MSH6	c.2403_2426del	p.P802_V809del	I	NE	NE	NE	NE
MSH6	c.3303G>T	p.K1101N	M	NE	NE	NE	NE
MSH6	c.3724_3726del	p.R1242del	I	NE	NE	NE	NE
MSH6	c.3744_3773del	p.H1248_S1257del	I	NE	NE	NE	NE
MSH6	c.4062_4065dup	p.L1356Dfs*4	I	NE	NE	NE	NE
PMS2	c.52A>G	p.I18V	M	NE	NE	NE	NE
PMS2	c.137G>T	p.S46I	M	NE	NE	NE	NE
PMS2	c.251-18C>G	p.?	S	A-SS	NE	NE	Inc
PMS2	c.383C>T	p.S128L	M	NE	NE	A-SS	Inc
PMS2	c.1437C>G	p.H479Q	M	NE	NE	NE	NE
PMS2	c.2276-17A>G	p.?	S	NE	A-SS	A-SS	A-SS
PMS2	c.2356C>A	p.L786M	M	NE	NE	NE	NE
PMS2	c.2527T>C	p.C843R	M	NE	NE	NE	NE
PMS2	c.2531C>A	p.P844H	M	NE	NE	NE	NE

## Sheet: S6
Supplementary Table 6. Detailed results of in silico RNA bioinformatic prediction tools for those variants classified as affecting Splicing Sites or Inconclusive by In silico prediction tools. Results in gray indicate major alterations. For splice site predictions, major alterations are those that are predicted to destroy or create splicing sites or produce a SS score modification ≥20%; Predictio…
Gene	DNA change	Protein change	Mutation Type	SS	NNsplice			Softberry			Spliceport			Final classification at mRNA level
					WT	MUT	Interpretation	WT	MUT	Interpretation	WT	MUT	Interpretation
MLH1	c.1410-10T>G	p.?	S	A	0.99	0.97	NE	0.89	0.88	NE	2.21	1.8	A-SS	Inc
				D	0.99	0.99		0.78	0.78		0.9	0.9
MLH1	c.1958T>G	p.L653R	M	A	0.43	0.43	NE	0.66	0.66	A-SS	0.62	0.87	NE	Inc
				D	0.91	0.91		0.76	NR		0.9	0.88
MLH1	c.208-3C>G	p.?	S	A	0.67	NR	A-SS	0.71	0.66	NE	0.36	NR	A-SS	A-SS
				D	1	1		0.79	0.79		0.85	0.85
MLH1	c.292G>A	p.G98S	M	A	0.67	0.67	A-SS	0.71	0.71	NE	0.36	0.36	A-SS	A-SS
				A'	NR	0.91		NR	NR		NR	NR
				D	1	1		0.79	0.79		0.85	0.68
MLH1	c.299G>A	p.R100Q	M	A	0.67	0.67	A-SS	0.71	0.71	NE	0.36	0.36	NE	Inc
				A'	NR	0.54		NR	NR		NR	NR
				D	1	1		0.79	0.82		0.86	0.77
MLH1	c.306G>T	p.E102D	M	A	0.67	0.67	A-SS	0.71	0.71	A-SS	0.21	0.21	A-SS	A-SS
				D	1	0.78		0.79	NR		0.85	NR
MSH2	c.2320A>G	p.I774V	M	A	0.61	0.61	A-SS	NR	NR	A-SS	NR	NR	A-SS	A-SS
				D	1	1		0.85	0.85		1.57	1.57
				D'	NR	0.85		NR	0.84		NR	0.69
MSH2	c.2635-3C>G	p.?	S	A	0.68	0.57	A-SS	0.76	0.77	NE	0.62	NR	A-SS	A-SS
				D	0.82	0.82		0.72	0.72		1.18	1.18
PMS2	c.251-18C>G	p.?	S	A	0.39	0.04	A-SS	0.71	0.72	NE	0.8	0.77	NE	Inc
				D	NR	NR		0.77	0.77		0.48	0.48
PMS2	c.383C>T	p.S128L	S	A	0.74	0.75	NE	0.68	0.68	NE	0.84	0.62	A-SS	Inc
				D	NR	NR		0.8	0.8		0.54	0.54
PMS2	c.2276-17T>C	p.?	S	A	0.9	0.9	NE	0.66	NR	A-SS	0.53	0.36	A-SS	A-SS
				D	1	1		0.84	0.84		1.15	1.15

## Sheet: S7
Supplementary Table 7. Splicing validation set using three bioinformatic in silico programs of a set of splicing variants obtained from the InSIGHT database and that have been already re-classified as Class 1 and 5. Results in gray indicate major alterations, which are destroyed or created SS or score modifications ≥20%; Predictions are interpreted as inconclusive when only one program predict pa…
Gene	DNA change	Protein change	Classification reported	NNSplice	Softberry	Spliceport	Final classification at mRNA level
MLH1	c.1990-2A>G	p.?	Damaging (class 5)	A-SS	A-SS	NE	A-SS
MLH1	c.545+3A>G	p.?	Damaging (class 5)	A-SS	NE	NE	Inc
MLH1	c.791-5T>G	p.?	Damaging (class 5)	NE	A-SS	NE	Inc
MLH1	c.884+4A>G	p.?	Damaging (class 5)	A-SS	A-SS	A-SS	A-SS
MLH1	c.1039-8T>A	p.?	Neutral (class 1)	NE	NE	NE	NE
MLH1	c.453+79A>G	p.?	Neutral (class 1)	NE	NE	NE	NE
MLH1	c.655A>G	p.Ile219Leu	Neutral (class 1)	NE	NE	NE	NE
MLH1	c.678-1G>C	p.?	Neutral (class 1)	NE	NE	NE	NE
MSH2	c.2005+2T>C	p.?	Damaging (class 5)	A-SS	A-SS	A-SS	A-SS
MSH2	c.2634+5G>C	p.?	Damaging (class 5)	A-SS	A-SS	A-SS	A-SS
MSH2	c.645+1G>A	p.?	Damaging (class 5)	A-SS	A-SS	A-SS	A-SS
MSH2	c.646-3T>G	p.?	Damaging (class 5)	NE	A-SS	A-SS	A-SS
MSH2	c.1077-80G>A	p.?	Neutral (class 1)	NE	NE	NE	NE
MSH2	c.1662-9G>A	p.?	Neutral (class 1)	NE	NE	NE	NE
MSH2	c.2345C>T	p.Thr782Ile	Neutral (class 1)	NE	NE	NE	NE
MSH2	c.965G>A	p.Gly322Asp	Neutral (class 1)	NE	NE	NE	NE
MSH6	c.4001+2T>C	p.?	Damaging (class 5)	A-SS	A-SS	NE	A-SS
MSH6	c.457+2T>A	p.?	Damaging (class 5)	A-SS	A-SS	A-SS	A-SS
MSH6	c.116G>A	p.Gly39Glu	Neutral (class 1)	NE	NE	NE	NE
MSH6	c.3557-3A>T	p.?	Neutral (class 1)	NE	NE	NE	NE
PMS2	c.2174+1G>A	p.?	Damaging (class 5)	A-SS	A-SS	A-SS	A-SS
PMS2	c.989-1G>T	p.?	Damaging (class 5)	A-SS	A-SS	A-SS	A-SS
PMS2	c.1866G>A	p.Met622Ile	Neutral (class 1)	NE	NE	NE	NE
PMS2	c.251-72A>G	p.?	Neutral (class 1)	NE	NE	NE	NE

## Sheet: S8
Supplementary Table 8. Detailed in silico RNA bioinformatic prediction results for splicing variants already reclassified as class 5 used for validation of in silico tools. Variants presented here were predicted to be Aberrant or Inconclusive based on our RNA in silico approach. Results in gray indicate major alterations. For splice site prediction, major alternations are destroyed or created SS …
Gene	DNA change	Protein change	Classification reported	SS	NNsplice			Softberry			Spliceport			Final classification at mRNA level
					WT	MUT	Interpretation	WT	MUT	Interpretation	WT	MUT	Interpretation
MLH1	c.1990-2A>G	p.?	Damaging (class 5)	A	NR	NR	A-SS	NR	NR	A-SS	0.91	NR	A-SS	A-SS
				D	0.58	NR		0.76	0.76		0.9	0.9
MLH1	c.545+3A>G	p.?	Damaging (class 5)	A	0.99	0.99	A-SS	0.69	0.69	NE	1.2	1.2	NE	Inc
				D	0.76	NR		0.79	0.79		0.67	0.67
MLH1	c.791-5T>G	p.?	Damaging (class 5)	A	0.99	0.97	NE	0.71	0.65	NE	0.48	NR	A-SS	Inc
				D	0.98	0.98		0.81	0.81		0.97	0.97
MLH1	c.884+4A>G	p.?	Damaging (class 5)	A	0.99	0.99	NE	0.71	0.71	A-SS	1.13	1.13	A-SS	A-SS
				D	0.93	0.59		0.79	NR		0.35	NR
MSH2	c.2005+2T>C	p.?	Damaging (class 5)	A	0.95	0.95	A-SS	0.65	0.65	A-SS	1.2	1.2	A-SS	A-SS
				D	0.86	NR		0.77	NR		0.86	NR
MSH2	c.2634+5G>C	p.?	Damaging (class 5)	A	0.99	0.99	A-SS	0.75	0.75	A-SS	0.62	0.62	A-SS	A-SS
				D	0.79	NR		0.78	NR		0.75	NR
MSH2	c.645+1G>A	p.?	Damaging (class 5)	A	0.98	0.98	A-SS	0.68	0.68	A-SS	1.09	1.09	A-SS	A-SS
				D	1	NR		0.85	NR		1.9	NR
MSH2	c.646-3T>G	p.?	Damaging (class 5)	A	0.99	0.99	NE	0.68	NR	A-SS	0.12	NR	A-SS	A-SS
				D	1	1		0.81	0.81		1.9	1.9
MSH6	c.4001+2T>C	p.?	Damaging (class 5)	A	0.85	0.85	A-SS	0.69	0.69	A-SS	0.35	0.35	A-SS	A-SS
				D	0.98	NR		0.78	NR		0.33	NR
MSH6	c.457+2T>A	p.?	Damaging (class 5)	A	0.99	0.99	A-SS	0.7	0.7	A-SS	0.7	0.7	A-SS	A-SS
				D	0.99	NR		0.85	NR		1.04	NR
PMS2	c.2174+1G>A	p.?	Damaging (class 5)	A	0.71	NR	A-SS	0.77	NR	A-SS	0.7	NR	A-SS	A-SS
				D	0.99	0.99		0.83	0.83		1.16	1.16
PMS2	c.989-1G>T	p.?	Damaging (class 5)	A	0.98	NR	A-SS	0.69	NR	A-SS	1.3	NR	A-SS	A-SS
				D	1	1		0.88	0.88		2.4	2.4

## Sheet: S9 
Supplementary Table 9. Classification at protein level of reported VUS using five bioinformatic in silico programs. Results in gray indicate major alterations. Predictions are interpreted as inconclusive when the same results are not obtained by all the programs used. Abbreviations: PrD, Probably Damaging; Ben, Benign; Tol, Tolerant; Bor, Borderline; D, damaging; Neu, neutral; H, high functional …
Gene	DNA change	Protein change	Mutation Type	SIFT	Polyphen2 (Hum Var)	Mutation Assessor	FATHMM	MAPP	In silico classification at protein level using 5 tools	In silico classification at protein level using Prior Probability approach
MLH1	c.143A>C	p.Q48P	M	D	prD	M	D	D	D	VUS
MLH1	c.208-3C>G	p.?	S	-	-	-	-	-	-	-
MLH1	c.290A>G	p.Y97C	M	D	prD	M	D	D	D	D
MLH1	c.292G>A	p.G98S	M	D	prD	H	D	D	D	VUS
MLH1	c.299G>A	p.R100Q	M	D	prD	H	D	D	D	VUS
MLH1	c.306G>T	p.E102D	M	D	prD	H	D	D	D	VUS
MLH1	c.326A>C	p.H109P	M	D	prD	H	D	D	D	D
MLH1	c.539T>G	p.V180G	M	D	prD	H	D	D	D	VUS
MLH1	c.601G>C	p.V201L	M	T	T	L	D	D	N	N
MLH1	c.617C>T	p.T206I	M	D	prD	H	D	D	D	D
MLH1	c.647T>A	p.I216N	M	D	prD	H	D	D	D	D
MLH1	c.830A>G	p.E277G	M	D	prD	M	D	D	D	D
MLH1	c.935A>C	p.H312P	M	D	prD	M	D	D	D	D
MLH1	c.1410-10T>G	p.?	S	-	-	-	-	-	-	-
MLH1	c.1517T>C	p.V506A	M	D	psD	M	D	D	prD	D
MLH1	c.1595G>A	p.G532D	M	D	prD	H	D	D	D	D
MLH1	c.1850A>C	p.K617T	M	T	T	L	D	Br	N	N
MLH1	c.1889T>A	p.I630N	M	D	prD	M	D	D	D	D
MLH1	c.1958T>G	p.L653R	M	D	prD	H	D	D	D	D
MSH2	c.147C>G	p.D49E	M	T	prD	M	D	D	prD	D
MSH2	c.328A>C	p.K110Q	M	T	prD	M	D	D	prD	D
MSH2	c.806C>T	p.S269L	M	D	T	M	D	D	prD	N
MSH2	c.1121A>G	p.Q374R	M	T	T	M	D	D	prD	VUS
MSH2	c.1361T>G	p.I454R	M	D	prD	M	D	D	D	D
MSH2	c.1387-59del231	p.?	I	-	-	-	-	-	-	-
MSH2	c.1387-8G>T	p.?	S	-	-	-	-	-	-	-
MSH2	c.1804C>G	p.L602V	M	D	T	M	D	D	prD	N
MSH2	c.1815_1817del	p.V606del	I	-	-	-	-	-	-	-
MSH2	c.2030C>G	p.T677R	M	D	prD	H	D	D	D	VUS
MSH2	c.2210+7G>T	p.?	S	-	-	-	-	-	-	-
MSH2	c.2234T>G	p.I745R	M	D	prD	H	D	D	D	D
MSH2	c.2320A>G	p.I774V	M	D	psD	L	D	D	prD	N
MSH2	c.2510C>T	p.P837L	M	D	prD	H	D	D	D	D
MSH2	c.2635-3C>G	p.?	S	-	-	-	-	-	-	-
MSH6	c.59C>T	p.A20V	M	T	T	N	D	D	N	N
MSH6	c.866_867delinsAA	p.G289E	M	T	T	L	D	Br	N	N
MSH6	c.1109T>C	p.L370S	M	D	prD	M	D	D	D	VUS
MSH6	c.1295T>C	p.F432S	M	D	prD	H	D	D	D	VUS
MSH6	c.1508C>G	p.S503C	M	D	prD	M	D	D	D	VUS
MSH6	c.1857A>C	p.E619D	M	T	psD	M	D	T	prD	N
MSH6	c.2403_2426del	p.P802_V809del	I	-	-	-	-	-	-	-
MSH6	c.3303G>T	p.K1101N	M	T	T	L	D	Br	N	N
MSH6	c.3724_3726del	p.R1242del	I	-	-	-	-	-	-	-
MSH6	c.3744_3773del	p.H1248_S1257del	I	-	-	-	-	-	-	-
MSH6	c.4062_4065dup	p.L1356Dfs*4	I	-	-	-	-	-	-	-
PMS2	c.52A>G	p.I18V	M	D	prD	M	D	D	D	VUS
PMS2	c.137G>T	p.S46I	M	D	prD	H	T	D	D	D
PMS2	c.251-18C>G	p.?	S	-	-	-	-	-	-	-
PMS2	c.383C>T	p.S128L	M	D	psD	M	T	D	prD	D
PMS2	c.1437C>G	p.H479Q	M	T	T	N	T	T	N	N
PMS2	c.2276-17A>G	p.?	S	-	-	-	-	-	-	-
PMS2	c.2356C>A	p.L786M	M	T	psD	L	T	D	N	N
PMS2	c.2527T>C	p.C843R	M	D	prD	H	T	D	D	D
PMS2	c.2531C>A	p.P844H	M	D	prD	H	T	D	D	D
19

## Sheet: S10
Supplementary Table 10. Detailed results of in silico analysis at protein level. Abbreviations: M, missense; S, splicing; I, intronic.
Gene	DNA change	Protein change	Mutation Type	SIFT	Polyphen	Mutation Assessor	FATHAMM	MAPP	PrProb (MAPP+Polyphen)
MLH1	c.143A>C	p.Q48P	M	0.02	0.997	3.48	-3.6	11.47	0.642313
MLH1	c.208-3C>G	p.?	S	-	-	-	-	-	-
MLH1	c.290A>G	p.Y97C	M	0	1	3.04	-3.8	23.02	0.898398
MLH1	c.292G>A	p.G98S	M	0	1	4.605	-7.55	7.5	0.409467
MLH1	c.299G>A	p.R100Q	M	0	1	4.605	-2.77	14.43	0.753865
MLH1	c.306G>T	p.E102D	M	0	1	4.605	-3.55	13.31	0.718277
MLH1	c.326A>C	p.H109P	M	0	1	3.875	-3.52	43.5	0.974022
MLH1	c.539T>G	p.V180G	M	0	0.996	3.86	-2.81	14.65	0.757062
MLH1	c.601G>C	p.V201L	M	0.38	0	0.85	-2.53	8.14	0.0116551
MLH1	c.617C>T	p.T206I	M	0	1	3.14	-1.55	33.48	0.953905
MLH1	c.647T>A	p.I216N	M	0	1	4.45	-1.84	17.95	0.834081
MLH1	c.830A>G	p.E277G	M	0.01	1	3.375	-1.93	28.23	0.933558
MLH1	c.935A>C	p.H312P	M	0.01	0.999	3.25	-1.84	43.5	0.973914
MLH1	c.1410-10T>G	p.?	S	-	-	-	-	-	-
MLH1	c.1517T>C	p.V506A	M	0.01	0.96	2.87	-2.68	27.75	0.919335
MLH1	c.1595G>A	p.G532D	M	0	1	3.64	-2.53	35.86	0.960294
MLH1	c.1850A>C	p.K617T	M	0.13	0.001	1.455	-3.32	4.9	0.0037279
MLH1	c.1889T>A	p.I630N	M	0	1	3.5	-3.41	17.95	0.834081
MLH1	c.1958T>G	p.L653R	M	0	1	3.57	-3.73	33.02	0.952504
MSH2	c.147C>G	p.D49E	M	0.06	0.999	2.655	-3.58	23.98	0.906194
MSH2	c.328A>C	p.K110Q	M	0.17	0.999	2.36	-2.5	14.08	0.742563
MSH2	c.806C>T	p.S269L	M	0.05	0.17	2.765	-2.51	9.59	0.0340934
MSH2	c.1121A>G	p.Q374R	M	0.12	0.003	2.035	-2.69	33.7	0.231031
MSH2	c.1361T>G	p.I454R	M	0	0.998	2.9	-3.12	31.1	0.945522
MSH2	c.1387-59del	p.?	I	-	-	-	-	-	-
MSH2	c.1387-8G>T	p.?	S	-	-	-	-	-	-
MSH2	c.1804C>G	p.L602V	M	0.03	0.47	2.755	-4.01	12.02	0.174613
MSH2	c.1815_1817del	p.V606del	I	-	-	-	-	-	-
MSH2	c.2030C>G	p.T677R	M	0	1	4.225	-3.35	37.76	0.964529
MSH2	c.2210+7G>T	p.?	S	-	-	-	-	-	-
MSH2	c.2234T>G	p.I745R	M	0	0.993	3.815	-2.39	32.56	0.949635
MSH2	c.2320A>G	p.I774V	M	0.04	0.529	0.98	-1.95	10.65	0.171272
MSH2	c.2510C>T	p.P837L	M	0	1	4.62	-3.58	26.92	0.926547
MSH2	c.2635-3C>G	p.?	S	-	-	-	-	-	-
MSH6	c.59C>T	p.A20V	M	0.17	0.041	0.55	-1.9	5.08	0.00479257
MSH6	c.866_867delinsAA	p.G289E	M	1	0.002	1.04	-1.74	4.3	0.00278582
MSH6	c.1109T>C	p.L370S	M	0.01	0.977	2.415	-2.06	10.92	0.595963
MSH6	c.1295T>C	p.F432S	M	0	1	4.18	-3.08	19.43	0.8575
MSH6	c.1508C>G	p.S503C	M	0.01	0.998	2.025	-2.15	21.15	0.878543
MSH6	c.1857A>C	p.E619D	M	0.23	0.815	2.455	-2.25	1.95	0.0145985
MSH6	c.2403_2426del	p.P802_V809del	I	-	-	-	-	-	-
MSH6	c.3303G>T	p.K1101N	M	0.46	0.009	0.83	-2.26	4.99	0.00401866
MSH6	c.3724_3726del	p.R1242del	I	-	-	-	-	-	-
MSH6	c.3744_3773del	p.H1248_S1257del	I	-	-	-	-	-	-
MSH6	c.4062_4065dup	p.L1356Dfs*4	I	-	-	-	-	-	-
PMS2	c.52A>G	p.I18V	M	0.01	0.998	2.605	-2.22	10.65	0.603795
PMS2	c.137G>T	p.S46I	M	0	1	4.35	-1.25	29.33	0.938742
PMS2	c.251-18C>G	p.?	S	-	-	-	-	-	-
PMS2	c.383C>T	p.S128L	M	0.03	0.861	2.51	-0.87	28.64	0.889266
PMS2	c.1437C>G	p.H479Q	M	0.6	0	-0.895	1.14	1.98	0.000476117
PMS2	c.2276-17A>G	p.?	S	-	-	-	-	-	-
PMS2	c.2356C>A	p.L786M	M	0.21	0.708	1.625	-1.25	5.2	0.0800649
PMS2	c.2527T>C	p.C843R	M	0	1	4.645	-1.31	34.86	0.957773
PMS2	c.2531C>A	p.P844H	M	0	1	4.565	-1.33	19.31	0.855773

[truncated: 5 more sheets: S11,  S12, S13, S14, S15]
